# Supplementary material
Source: MDPI journal article supplement (https://www.mdpi.com/1424-8247/17/5/632)

## Supplementary Materials

### The Synergistic Effect of N2 and N7 Modifications on the Inhibitory Efficacy of mRNA Cap Analogues

Karol Kurpiejewski<sup>1</sup>, Karolina Piecyk<sup>1</sup>, Maciej Lukaszewicz<sup>2</sup>, Karol Kamel<sup>3</sup>, Kazimierz Chmurski<sup>1</sup>, Sebastian Kmiecik<sup>4</sup> and Marzena Jankowska-Anyska<sup>1\*</sup>

<sup>1</sup>Faculty of Chemistry, University of Warsaw, 02-093 Warsaw, Poland

<sup>2</sup>Division of Biophysics, Institute of Experimental Physics, University of Warsaw, 02-093 Warsaw, Poland

<sup>3</sup>Institute of Bioorganic Chemistry, Polish Academy of Sciences, 61-704 Poznan, Poland

<sup>4</sup>Biological and Chemical Research Centre, Faculty of Chemistry, University of Warsaw, 02-089 Warsaw, Poland

\* **Correspondence:** [marzena@chem.uw.edu.pl](mailto:marzena@chem.uw.edu.pl), [m.jankowska-an@uw.edu.pl](mailto:m.jankowska-an@uw.edu.pl)

#### The intermediate products

#### N2-(prop-2-yn)-7-benzylguanosine 5'-monophosphate (a)

MS (ES+ and ES-)

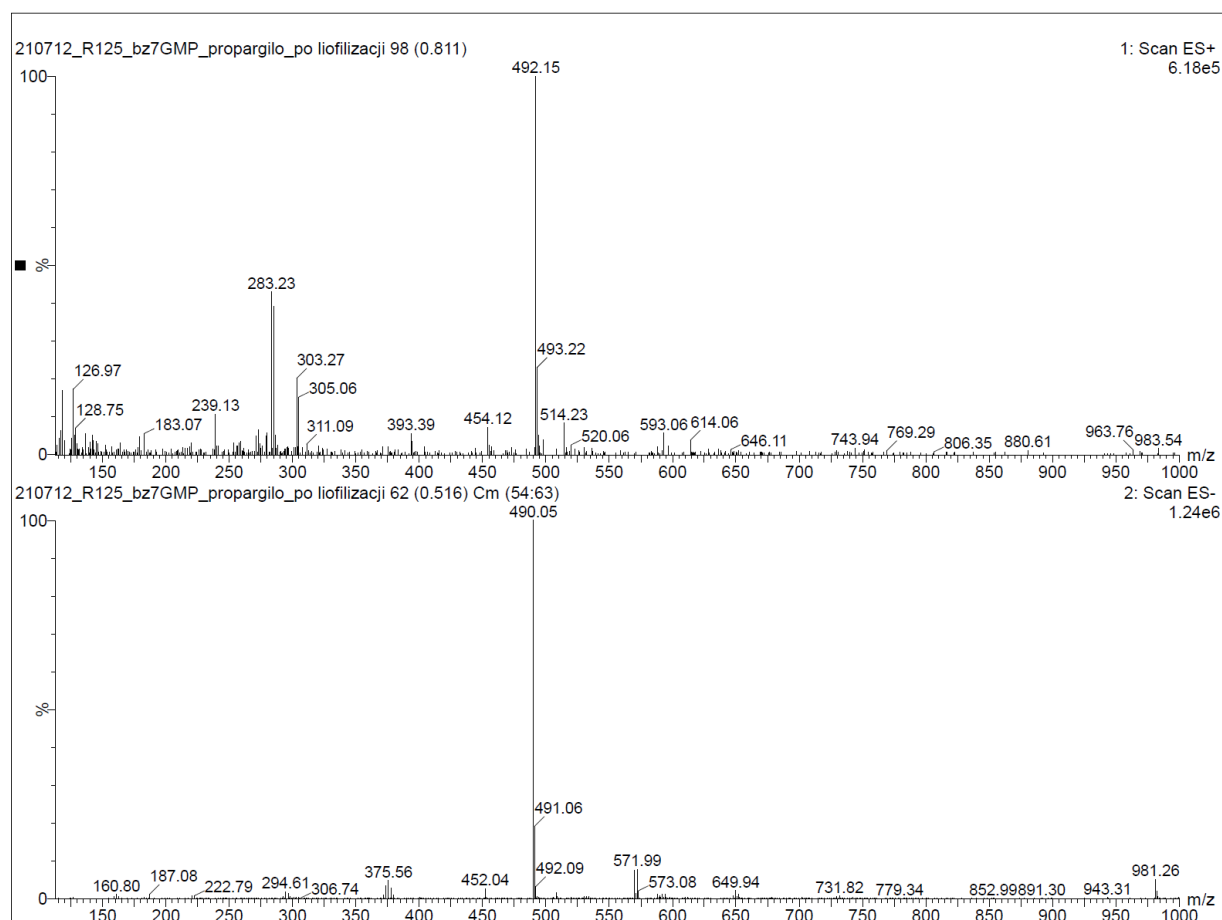

# P1-N2-(prop-2-yn)-7-benzylguanosine-P3-guanosine 5',5'-triphosphate (b)

MS (ES+ and ES-)

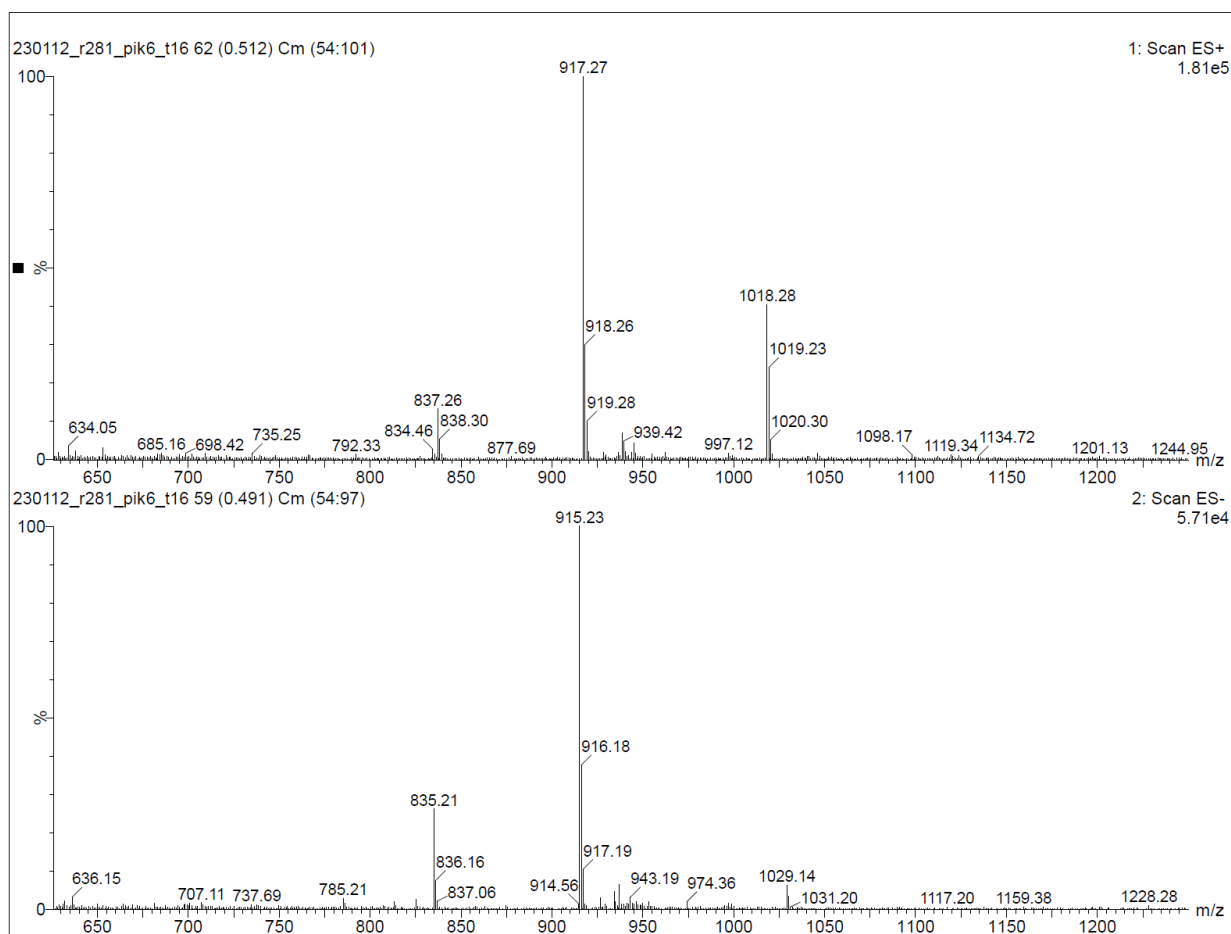

The final products:

**N2-{1-[2-(2,6-dimethoxyphenoxy)propyl]-1H-1,2,3-triazol-4-yl}methylene-7-benzylguanosine 5'-monophosphate (3)**

<sup>1</sup>H NMR

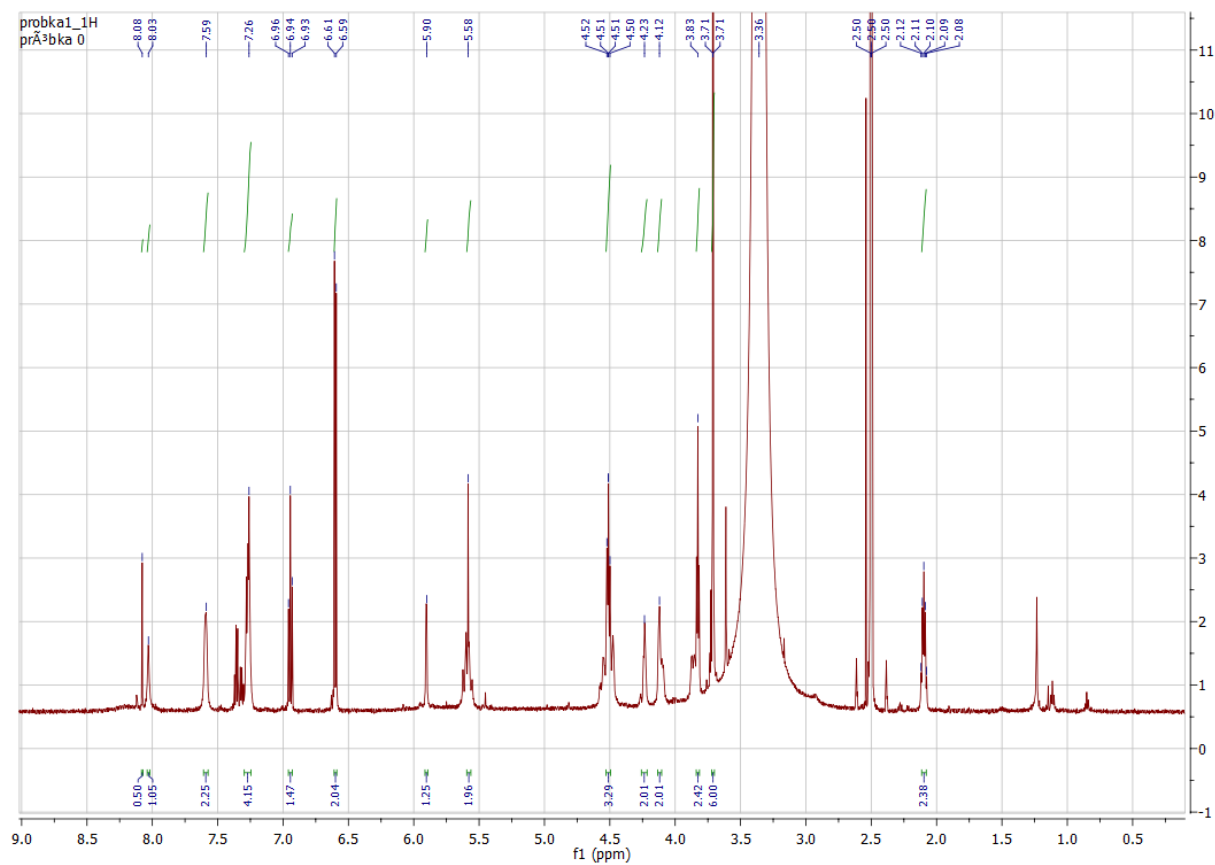

# $^{31}\text{P}$ NMR

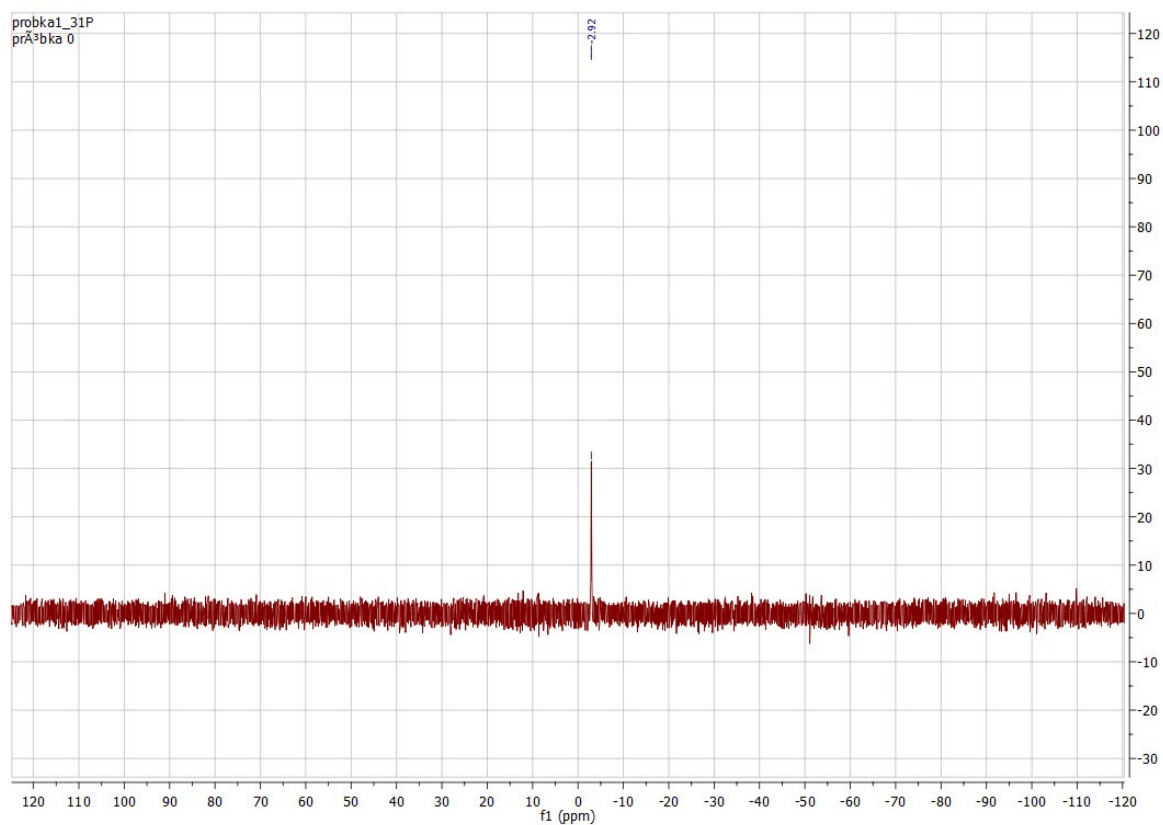

# HRMS (ES+)

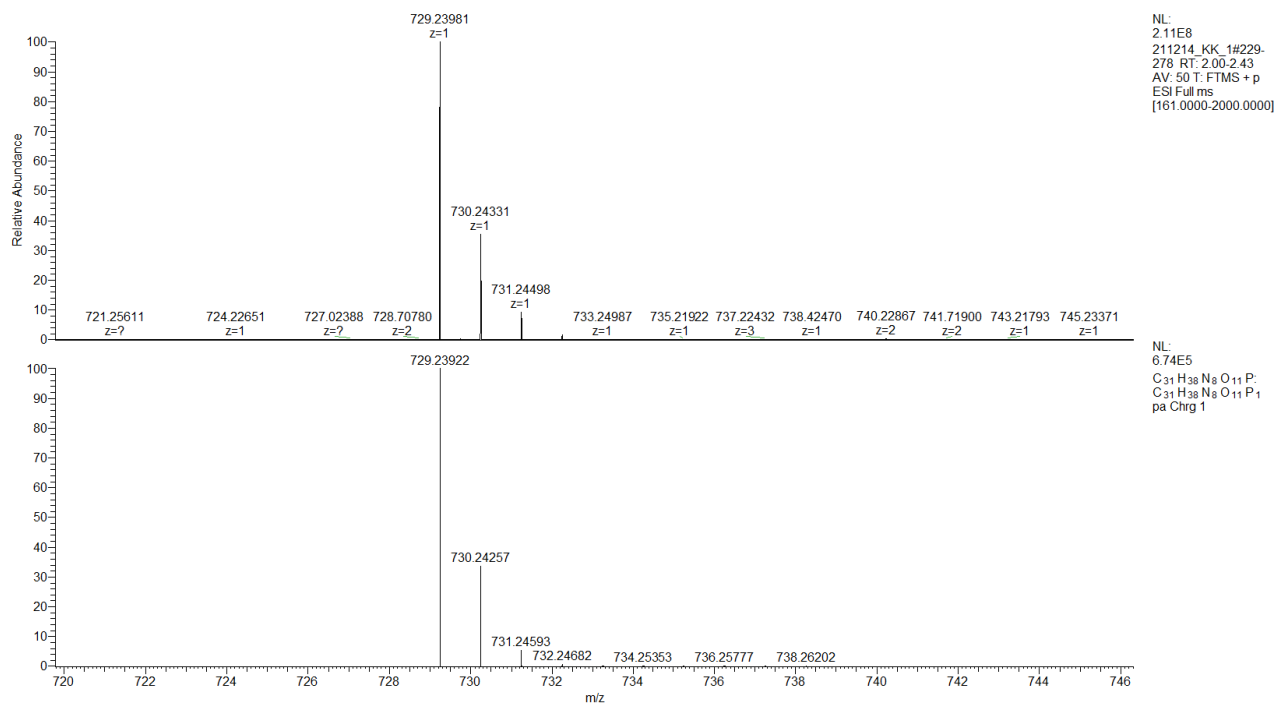

**P1-N2-{1-[2-(2,6-dimethoxyphenoxy)propyl]-1H-1,2,3-triazol-4-yl}methylene-7-benzylguanosine-P3-guanosine 5',5'-triphosphate (4)**

<sup>1</sup>H NMR

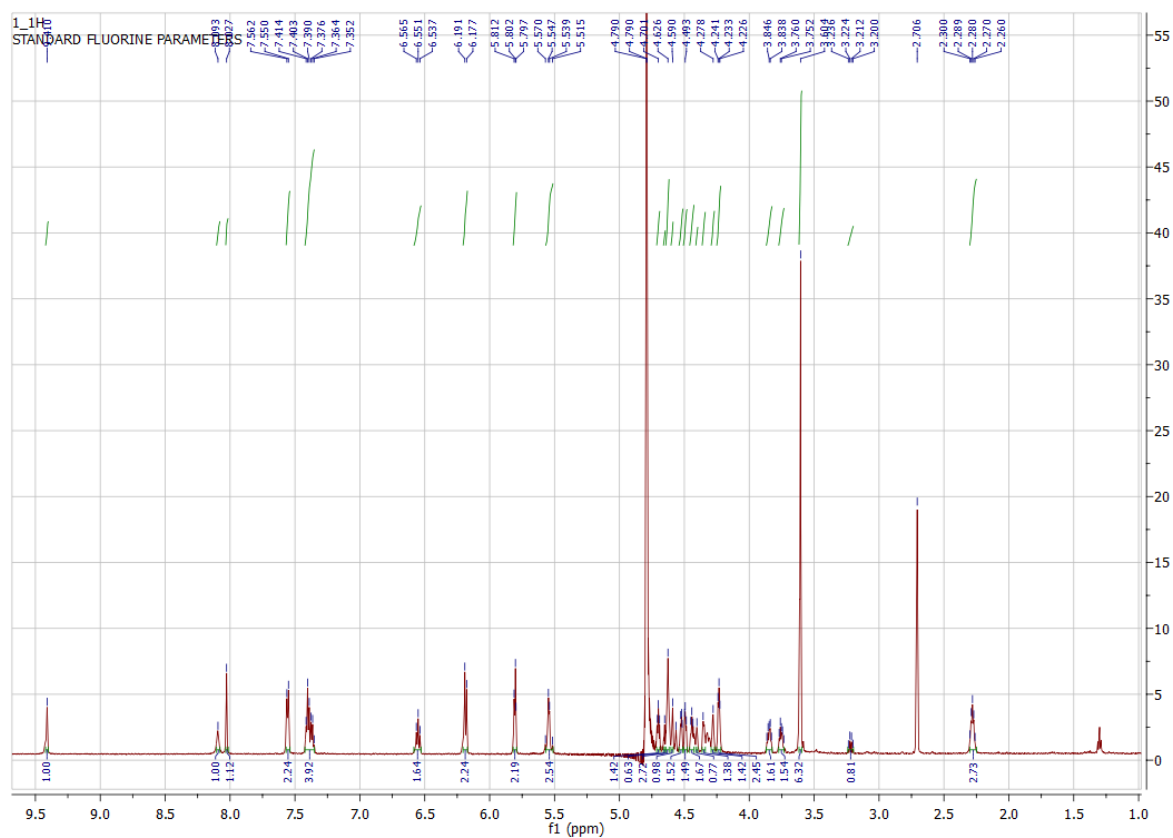

<sup>31</sup>P NMR

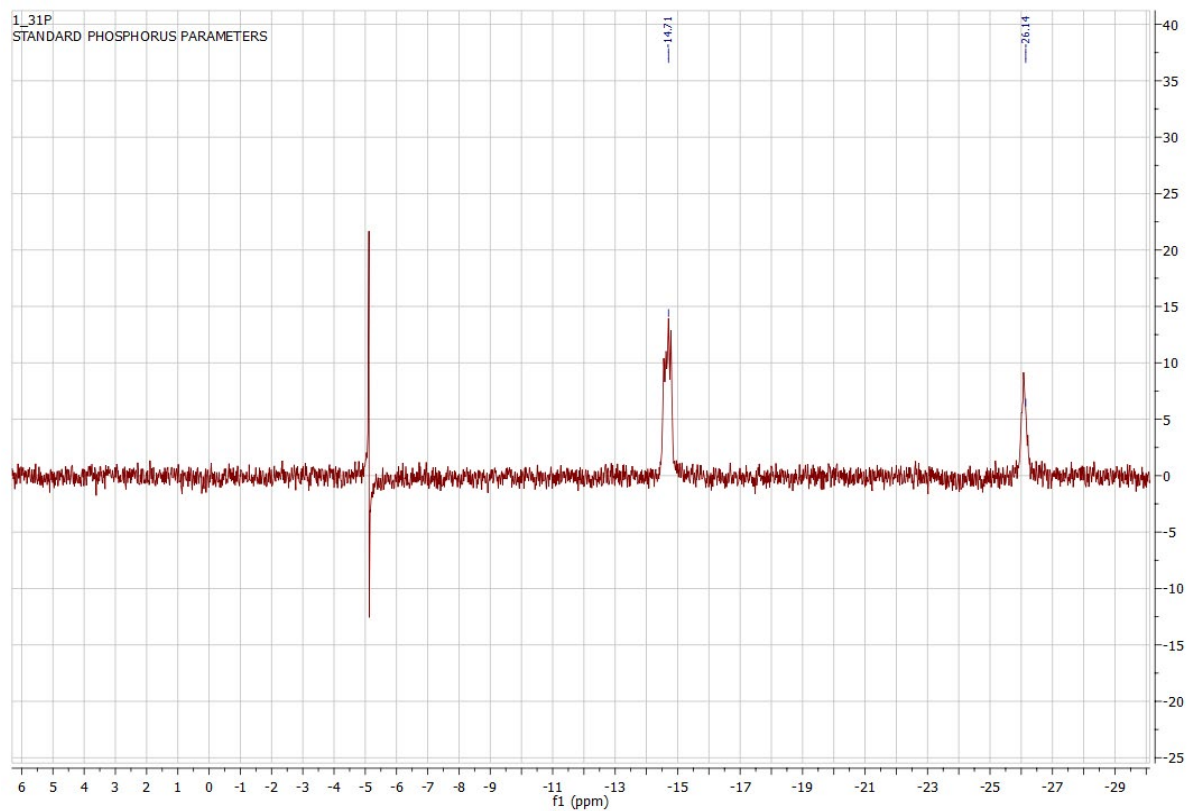

## HRMS (ES+)

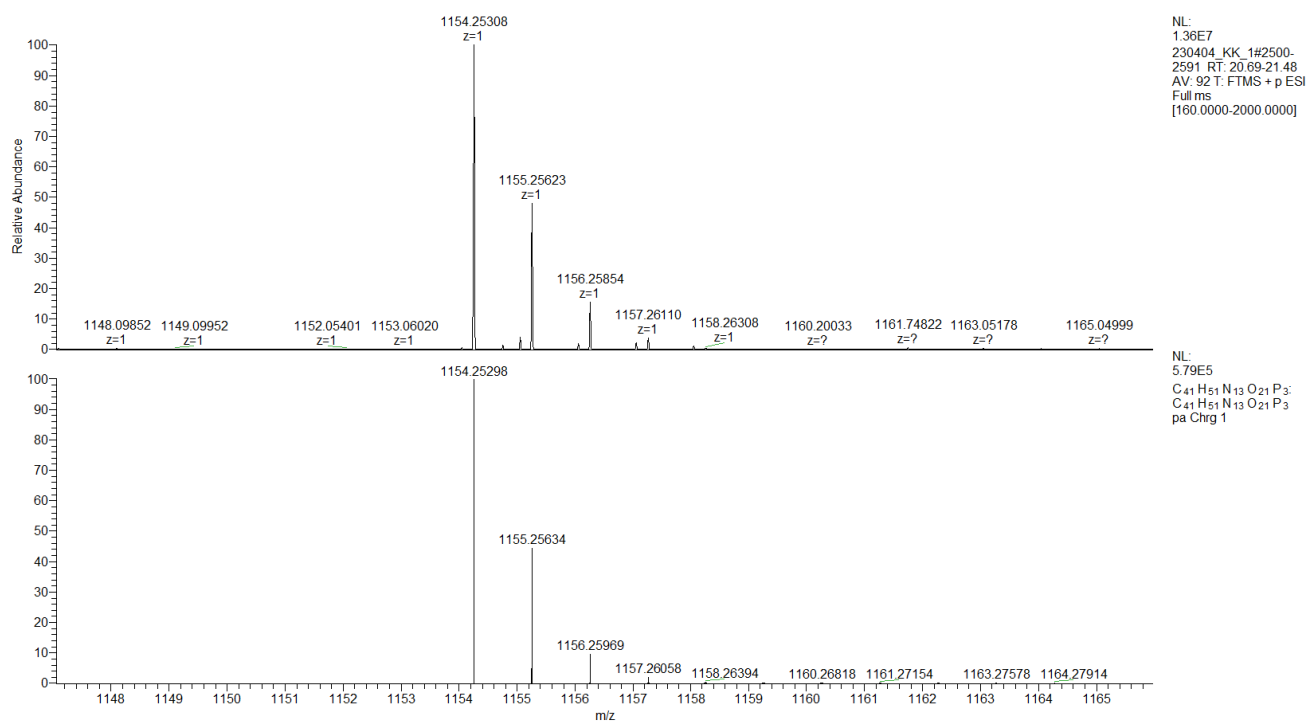

Supplement: s1 [file s1]
